# Supplementary material for: The Risk of Pyelonephritis Following Uncomplicated Cystitis: A Nationwide Primary Healthcare Study
Source: MDPI journal article supplement (doi:10.3390/antibiotics11121695), 2022-11-24

## Supplementary

# The Risk of Pyelonephritis following Uncomplicated Cystitis: A Nationwide Primary Healthcare Study

Filip Jansåker <sup>1,2,\*</sup>, Xinjun Li <sup>1</sup>, Ingvild Vik <sup>3,4</sup>, Niels Frimodt-Møller <sup>2</sup>, Jenny Dahl Knudsen <sup>2</sup> and Kristina Sundquist <sup>1,5,6</sup>

**Table S1.** The study population of women with acute uncomplicated cystitis and acute pyelonephritis (outcome) diagnosed in outpatient specialist care or in primary healthcare settings within 30 days and within 90 days from the cystitis event (2006-2018)

**Table S2.** The association between antibiotic treatment (redeemed within five days) for acute uncomplicated cystitis and acute outpatient pyelonephritis diagnosed within 30 days from the cystitis event, adjusted for sociodemographic factors, cervical cancer, and parity (2006-2018)

**Table S3.** The association between antibiotic treatment (redeemed within five days) for acute uncomplicated cystitis and acute outpatient pyelonephritis diagnosed within 90 days from the cystitis event, adjusted for sociodemographic factors, cervical cancer, and parity (2006-2018)

**Table S4.** Descriptive data and sensitivity analysis on the association between antibiotic treatment (redeemed within two days) for acute uncomplicated cystitis and acute outpatient pyelonephritis within 7 days and 30 days from the cystitis event (2006-2018)

**Table S5.** Sensitivity analysis on the association between antibiotic treatment (redeemed within two days) for acute uncomplicated cystitis and acute outpatient pyelonephritis within 7 days and 30 days from the cystitis event, adjusted for sociodemographic factors, cervical cancer, and parity (2006-2018)

**Table S6.** The study population of women with acute uncomplicated cystitis and hospitalization due to acute pyelonephritis (outcome) diagnosed within 30 days and 90 days from the cystitis event (2006-2018)

**Table S7.** The association between antibiotic treatment (redeemed within five days) for acute uncomplicated cystitis and hospitalization due to acute pyelonephritis within 30 days from the cystitis event, adjusted for sociodemographic factors, cervical cancer, and parity (2006-2018)

**Table S8.** The association between antibiotic treatment (redeemed within five days) for acute uncomplicated cystitis and hospitalization due to acute pyelonephritis within 90 days from the cystitis event, adjusted for sociodemographic factors, cervical cancer, and parity (2006-2018)

**Figure S1.** Flowchart of the eligibility criteria and sampling of the study population of women with a diagnose (first occurrence) of acute uncomplicated cystitis in nationwide primary healthcare data (1<sup>st</sup> January 2006 to 2<sup>nd</sup> October 2018) and follow-up for pyelonephritis (31<sup>st</sup> December 2018)

**Figure S2.** The 30-day risk of acute outpatient pyelonephritis after acute uncomplicated cystitis treated with antibiotics or not (redeemed within two days)  
(survival probability 1.00 = no cases of pyelonephritis)

**Figure S3.** The 30-day risk of acute outpatient pyelonephritis after acute uncomplicated cystitis treated with antibiotics or not (redeemed within five days)  
(survival probability 1.00 = no cases of pyelonephritis)

**Figure S4.** The 30-day risk of hospitalization due to acute pyelonephritis after acute uncomplicated cystitis treated with antibiotics or not (redeemed within five days)  
(survival probability 1.00 = no cases of pyelonephritis)

**Table S1.** The study population of women with acute uncomplicated cystitis and acute pyelonephritis (outcome) diagnosed in outpatient specialist care or in primary healthcare settings within 30 days and within 90 days from the cystitis event (2006-2018)

|                                                                                                                 | Total population |              | With acute pyelonephritis within: |              |             |             |              |             |
|-----------------------------------------------------------------------------------------------------------------|------------------|--------------|-----------------------------------|--------------|-------------|-------------|--------------|-------------|
|                                                                                                                 | No.              | Proportion % | 30 days                           |              |             | 90 days     |              |             |
|                                                                                                                 | No.              | Proportion % | No.                               | Proportion % | Case rate % | No.         | Proportion % | Case rate % |
| Including the 3585 women with pyelonephritis prior to antibiotic treatment in the no antibiotic treatment group |                  |              |                                   |              |             |             |              |             |
| <b>No antibiotic treatment</b>                                                                                  | 408 281          | 54.3         | 5829                              | 78.2         | 1.43        | 6574        | 77.6         | 1.61        |
| <b>Any antibiotic<sup>a</sup></b>                                                                               | 344 008          | 45.7         | 1625                              | 21.8         | 0.47        | 1898        | 22.4         | 0.55        |
| <b>All</b>                                                                                                      | 752 289          | 100.0        | 7454                              | 100.0        | 0.99        | 8472        | 100.0        | 1.13        |
| Excluding the 3585 women with pyelonephritis prior to antibiotic treatment                                      |                  |              |                                   |              |             |             |              |             |
| <b>No antibiotic treatment (in analysis)</b>                                                                    | 404 696          | 54.1         | 2244                              | 58.0         | 0.55        | 2989        | 61.2         | 0.74        |
| <b>Any antibiotic<sup>a</sup></b>                                                                               | 344 008          | 45.9         | 1625                              | 42.0         | 0.47        | 1898        | 38.8         | 0.55        |
| Penicillins with extended spectrum (J01CA)                                                                      | 201 114          | 26.9         | 490                               | 12.7         | 0.24        | 643         | 13.2         | 0.32        |
| Nitrofurans derivatives (J01XE)                                                                                 | 85 238           | 11.4         | 177                               | 4.6          | 0.21        | 235         | 4.8          | 0.28        |
| Trimethoprim and derivatives (J01EA)                                                                            | 35 361           | 4.7          | 51                                | 1.3          | 0.14        | 63          | 1.3          | 0.18        |
| Fluoroquinolones (J01MA)                                                                                        | 17 079           | 2.3          | 828                               | 21.4         | 4.85        | 868         | 17.8         | 5.08        |
| Cephalosporins (J01DB-E,I)                                                                                      | 4136             | 0.6          | 37                                | 1.0          | 0.89        | 44          | 0.9          | 1.06        |
| Others <sup>b</sup>                                                                                             | 1080             | 0.1          | 42                                | 1.1          | 3.89        | 45          | 0.9          | 4.17        |
| <b>Age groups (years)</b>                                                                                       |                  |              |                                   |              |             |             |              |             |
| 18-24                                                                                                           | 156 506          | 20.9         | 858                               | 22.2         | 0.55        | 1135        | 23.2         | 0.73        |
| 25-34                                                                                                           | 157 301          | 21.0         | 776                               | 20.1         | 0.49        | 986         | 20.2         | 0.63        |
| 34-44                                                                                                           | 140 796          | 18.8         | 721                               | 18.6         | 0.51        | 857         | 17.5         | 0.61        |
| 45-65                                                                                                           | 294 101          | 39.3         | 1514                              | 39.1         | 0.51        | 1909        | 39.1         | 0.65        |
| <b>Educational level</b>                                                                                        |                  |              |                                   |              |             |             |              |             |
| <12                                                                                                             | 465 996          | 62.2         | 2458                              | 63.5         | 0.53        | 3118        | 63.8         | 0.67        |
| > 12                                                                                                            | 282 708          | 37.8         | 1411                              | 36.5         | 0.50        | 1769        | 36.2         | 0.63        |
| <b>Family income</b>                                                                                            |                  |              |                                   |              |             |             |              |             |
| Low                                                                                                             | 179 204          | 23.9         | 848                               | 21.9         | 0.47        | 1076        | 22.0         | 0.60        |
| Middle                                                                                                          | 379 633          | 50.7         | 1998                              | 51.6         | 0.53        | 2510        | 51.4         | 0.66        |
| High                                                                                                            | 189 867          | 25.4         | 1023                              | 26.4         | 0.54        | 1301        | 26.6         | 0.69        |
| <b>Region of residence</b>                                                                                      |                  |              |                                   |              |             |             |              |             |
| Large cities                                                                                                    | 481 650          | 64.3         | 2451                              | 63.3         | 0.51        | 3089        | 63.2         | 0.64        |
| Southern Sweden                                                                                                 | 194 194          | 25.9         | 975                               | 25.2         | 0.50        | 1259        | 25.8         | 0.65        |
| Northern Sweden                                                                                                 | 72 860           | 9.7          | 443                               | 11.4         | 0.61        | 539         | 11.0         | 0.74        |
| <b>Country of origin</b>                                                                                        |                  |              |                                   |              |             |             |              |             |
| Sweden (born in)                                                                                                | 595 586          | 79.5         | 3142                              | 81.2         | 0.53        | 3965        | 81.1         | 0.67        |
| Eastern Europe                                                                                                  | 36 259           | 4.8          | 186                               | 4.8          | 0.51        | 229         | 4.7          | 0.63        |
| Western countries                                                                                               | 31 363           | 4.2          | 153                               | 4.0          | 0.49        | 188         | 3.8          | 0.60        |
| Middle East/North Africa                                                                                        | 42 756           | 5.7          | 166                               | 4.3          | 0.39        | 234         | 4.8          | 0.55        |
| Africa (excluding North Africa)                                                                                 | 11 845           | 1.6          | 53                                | 1.4          | 0.45        | 61          | 1.2          | 0.51        |
| Asia (excl. Middle East) and Oceania                                                                            | 20 320           | 2.7          | 110                               | 2.8          | 0.54        | 138         | 2.8          | 0.68        |
| Latin America and the Caribbean                                                                                 | 10 575           | 1.4          | 59                                | 1.5          | 0.56        | 72          | 1.5          | 0.68        |
| <b>Parity</b>                                                                                                   |                  |              |                                   |              |             |             |              |             |
| No child                                                                                                        | 318 340          | 42.5         | 1674                              | 43.3         | 0.53        | 2153        | 44.1         | 0.68        |
| With child                                                                                                      | 430 364          | 57.5         | 2195                              | 56.7         | 0.51        | 2734        | 55.9         | 0.64        |
| <b>Cervical cancer</b>                                                                                          |                  |              |                                   |              |             |             |              |             |
| Non                                                                                                             | 727 711          | 97.2         | 3743                              | 96.7         | 0.51        | 4731        | 96.8         | 0.65        |
| Yes                                                                                                             | 20 993           | 2.8          | 126                               | 3.3          | 0.60        | 156         | 3.2          | 0.74        |
| <b>All</b>                                                                                                      | <b>748 704</b>   | <b>100.0</b> | <b>3869</b>                       | <b>100.0</b> | <b>0.52</b> | <b>4887</b> | <b>100.0</b> | <b>0.65</b> |

a: within five days from the cystitis event and before the pyelonephritis event. \* 3585 women were excluded due to diagnosis of outcomes before antibiotic treatment. b: Others included ATC-codes J01MB, J01EB, J01EC, J01ED, J01EE, and J01CR. Nationwide primary healthcare data was used to identify the study population of women with uncomplicated cystitis. The Swedish Prescribed Drug Register was used to identify antibiotic treatment. Nationwide primary healthcare data and the National Patient Register (Out-patient data) were used to identify pyelonephritis.

**Table S2.** The association between antibiotic treatment (redeemed within five days) for acute uncomplicated cystitis and acute outpatient pyelonephritis diagnosed within 30 days from the cystitis event, adjusted for sociodemographic factors, cervical cancer, and parity (2006-2018)

| Covariates                                     | Model 1 |        |      | P-value | Model 2 |        |      | P-value | Model 3 |        |      | P-value |
|------------------------------------------------|---------|--------|------|---------|---------|--------|------|---------|---------|--------|------|---------|
|                                                | OR      | 95% CI |      |         | OR      | 95% CI |      |         | OR      | 95% CI |      |         |
| <b>Antibiotic (ref. Non)</b>                   | 0.85    | 0.80   | 0.91 | <.0001  | 0.85    | 0.80   | 0.91 | <.0001  | 0.85    | 0.80   | 0.91 | <.0001  |
| <b>Age (ref. age 18-24 years)</b>              |         |        |      |         |         |        |      |         |         |        |      |         |
| 25-34                                          |         |        |      |         | 0.91    | 0.82   | 1.00 | 0.0585  | 0.91    | 0.82   | 1.02 | 0.0930  |
| 34-44                                          |         |        |      |         | 0.94    | 0.85   | 1.04 | 0.1985  | 0.95    | 0.85   | 1.07 | 0.3927  |
| 45-65                                          |         |        |      |         | 0.91    | 0.83   | 0.99 | 0.0298  | 0.93    | 0.84   | 1.03 | 0.1393  |
| <b>Educational level (ref. &gt; 12 years)</b>  |         |        |      |         | 1.06    | 0.99   | 1.13 | 0.1176  | 1.06    | 0.99   | 1.13 | 0.1172  |
| <b>Family income (ref. High)</b>               |         |        |      |         |         |        |      |         |         |        |      |         |
| Low                                            |         |        |      |         | 0.88    | 0.80   | 0.97 | 0.0110  | 0.88    | 0.80   | 0.98 | 0.0136  |
| Middle                                         |         |        |      |         | 0.96    | 0.89   | 1.04 | 0.2813  | 0.96    | 0.89   | 1.04 | 0.2997  |
| <b>Region of residence (ref. Large cities)</b> |         |        |      |         |         |        |      |         |         |        |      |         |
| Southern Sweden                                |         |        |      |         | 0.97    | 0.90   | 1.05 | 0.4129  | 0.97    | 0.90   | 1.05 | 0.4207  |
| Northern Sweden                                |         |        |      |         | 1.17    | 1.05   | 1.29 | 0.0034  | 1.17    | 1.05   | 1.29 | 0.0034  |
| <b>Country of origin (ref. Born in Sweden)</b> |         |        |      |         |         |        |      |         |         |        |      |         |
| Eastern Europe                                 |         |        |      |         | 1.02    | 0.88   | 1.19 | 0.7939  | 1.02    | 0.88   | 1.18 | 0.8233  |
| Western countries                              |         |        |      |         | 0.95    | 0.81   | 1.12 | 0.5763  | 0.95    | 0.81   | 1.12 | 0.5648  |
| Middle East/North Africa                       |         |        |      |         | 0.78    | 0.67   | 0.92 | 0.0030  | 0.78    | 0.67   | 0.92 | 0.0031  |
| Africa (excluding North Africa)                |         |        |      |         | 0.89    | 0.68   | 1.17 | 0.4044  | 0.89    | 0.68   | 1.17 | 0.4045  |
| Asia (excluding Middle East) and Oceania       |         |        |      |         | 1.08    | 0.89   | 1.31 | 0.4463  | 1.08    | 0.89   | 1.31 | 0.4532  |
| Latin America and the Caribbean                |         |        |      |         | 1.10    | 0.85   | 1.42 | 0.4823  | 1.10    | 0.85   | 1.42 | 0.4905  |
| <b>Cervical cancer (ref. Non)</b>              |         |        |      |         |         |        |      |         | 0.98    | 0.91   | 1.06 | 0.5686  |
| <b>Parity (ref. Non)</b>                       |         |        |      |         |         |        |      |         | 1.14    | 0.95   | 1.37 | 0.1479  |

CI: Confidence interval. OR: Odds ratio. Nationwide primary healthcare data was used to identify the study population of women with uncomplicated cystitis. The Swedish Prescribed Drug Register was used to identify antibiotic treatment. Nationwide primary healthcare data and the National Patient Register (Out-patient data) were used to identify pyelonephritis. Model 1: Univariate. Model 2: Adjusted for sociodemographic factors. Model 3: Fully adjusted for all covariates.

**Table S3.** The association between antibiotic treatment (redeemed within five days) for acute uncomplicated cystitis and acute outpatient pyelonephritis diagnosed within 90 days from the cystitis event, adjusted for sociodemographic factors, cervical cancer, and parity (2006-2018)

| Covariates                                     | Model 1 |        |      | P-value | Model 2 |        |      | P-value | Model 3 |        |      | P-value |
|------------------------------------------------|---------|--------|------|---------|---------|--------|------|---------|---------|--------|------|---------|
|                                                | OR      | 95% CI |      |         | OR      | 95% CI |      |         | OR      | 95% CI |      |         |
| <b>Antibiotic (ref. Non)</b>                   | 0.75    | 0.70   | 0.79 | <.0001  | 0.75    | 0.70   | 0.79 | <.0001  | 0.75    | 0.70   | 0.79 | <.0001  |
| <b>Age (ref. age 18-24 years)</b>              |         |        |      |         |         |        |      |         |         |        |      |         |
| 25-34                                          |         |        |      |         | 0.86    | 0.79   | 0.94 | 0.0008  | 0.87    | 0.79   | 0.95 | 0.0027  |
| 34-44                                          |         |        |      |         | 0.83    | 0.76   | 0.91 | <.0001  | 0.85    | 0.76   | 0.94 | 0.0014  |
| 45-65                                          |         |        |      |         | 0.85    | 0.79   | 0.92 | <.0001  | 0.87    | 0.80   | 0.95 | 0.0028  |
| <b>Educational level (ref. &gt; 12 years)</b>  |         |        |      |         | 1.06    | 1.00   | 1.12 | 0.0724  | 1.06    | 1.00   | 1.12 | 0.0708  |
| <b>Family income (ref. High)</b>               |         |        |      |         |         |        |      |         |         |        |      |         |
| Low                                            |         |        |      |         | 0.86    | 0.79   | 0.94 | 0.0011  | 0.87    | 0.79   | 0.95 | 0.0015  |
| Middle                                         |         |        |      |         | 0.94    | 0.88   | 1.01 | 0.0848  | 0.94    | 0.88   | 1.01 | 0.0943  |
| <b>Region of residence (ref. Large cities)</b> |         |        |      |         |         |        |      |         |         |        |      |         |
| Southern Sweden                                |         |        |      |         | 0.98    | 0.92   | 1.05 | 0.6194  | 0.98    | 0.92   | 1.05 | 0.6312  |
| Northern Sweden                                |         |        |      |         | 1.11    | 1.01   | 1.22 | 0.0242  | 1.11    | 1.01   | 1.22 | 0.0243  |
| <b>Country of origin (ref. Born in Sweden)</b> |         |        |      |         |         |        |      |         |         |        |      |         |
| Eastern Europe                                 |         |        |      |         | 1.01    | 0.88   | 1.15 | 0.9103  | 1.00    | 0.88   | 1.15 | 0.9522  |
| Western countries                              |         |        |      |         | 0.94    | 0.81   | 1.09 | 0.4400  | 0.94    | 0.81   | 1.09 | 0.4242  |
| Middle East/North Africa                       |         |        |      |         | 0.89    | 0.77   | 1.02 | 0.0813  | 0.88    | 0.77   | 1.01 | 0.0788  |
| Africa (excluding North Africa)                |         |        |      |         | 0.82    | 0.64   | 1.06 | 0.1358  | 0.82    | 0.64   | 1.06 | 0.1333  |
| Asia (excluding Middle East) and Oceania       |         |        |      |         | 1.10    | 0.92   | 1.30 | 0.2877  | 1.10    | 0.92   | 1.30 | 0.2968  |
| Latin America and the Caribbean                |         |        |      |         | 1.08    | 0.85   | 1.36 | 0.5398  | 1.07    | 0.85   | 1.36 | 0.5531  |
| <b>Cervical cancer (ref. Non)</b>              |         |        |      |         |         |        |      |         | 0.97    | 0.91   | 1.04 | 0.4532  |
| <b>Parity (ref. Non)</b>                       |         |        |      |         |         |        |      |         | 1.11    | 0.95   | 1.31 | 0.1978  |

CI: Confidence interval. OR: Odds ratio. Nationwide primary healthcare data was used to identify the study population of women with uncomplicated cystitis. The Swedish Prescribed Drug Register was used to identify antibiotic treatment. Nationwide primary healthcare data and the National Patient Register (Out-patient data) were used to identify pyelonephritis. Model 1: Univariate. Model 2: Adjusted for individual sociodemographic factors. Model 3: Fully adjusted for all covariates.

**Table S4.** Sensitivity analysis on the association between antibiotic treatment (redeemed within two days) for acute uncomplicated cystitis and acute outpatient pyelonephritis within 7 days and 30 days from the cystitis event (2006-2018)

|                                                       | Total population                        |              | With acute pyelonephritis within 7 days |              |                                          | With acute pyelonephritis within 30 days |              |             |
|-------------------------------------------------------|-----------------------------------------|--------------|-----------------------------------------|--------------|------------------------------------------|------------------------------------------|--------------|-------------|
|                                                       | No.                                     | Proportion % | No.                                     | Proportion % | Case rate %                              | No.                                      | Proportion % | Case rate % |
| <b>No antibiotic treatment</b>                        | 413 115                                 | 55.2         | 1597                                    | 60.1         | 0.39                                     | 2457                                     | 63.5         | 0.59        |
| <b>Any antibiotics<sup>a</sup></b>                    | 335 589                                 | 44.8         | 1059                                    | 39.9         | 0.32                                     | 1412                                     | 36.5         | 0.42        |
| Penicillins with extended spectrum (J01CA)            | 197 111                                 | 26.3         | 264                                     | 9.9          | 0.13                                     | 484                                      | 12.5         | 0.25        |
| Nitrofurantoin derivatives (J01XE)                    | 83 307                                  | 11.1         | 111                                     | 4.2          | 0.13                                     | 173                                      | 4.5          | 0.21        |
| Trimethoprim and derivatives (J01EA)                  | 34 554                                  | 4.6          | 38                                      | 1.4          | 0.11                                     | 49                                       | 1.3          | 0.14        |
| Fluoroquinolones (J01MA)                              | 15 781                                  | 2.1          | 591                                     | 22.3         | 3.75                                     | 640                                      | 16.5         | 4.06        |
| Cephalosporins (J01DB-E,I)                            | 3843                                    | 0.5          | 25                                      | 0.9          | 0.65                                     | 31                                       | 0.8          | 0.81        |
| Others <sup>b</sup>                                   | 993                                     | 0.1          | 30                                      | 1.1          | 3.02                                     | 35                                       | 0.9          | 3.52        |
| <b>All</b>                                            | <b>748 704</b>                          | <b>100.0</b> | <b>2656</b>                             | <b>100.0</b> | <b>0.35</b>                              | <b>3869</b>                              | <b>100.0</b> | <b>0.52</b> |
|                                                       | With acute pyelonephritis within 7 days |              |                                         |              | With acute pyelonephritis within 30 days |                                          |              |             |
|                                                       | OR <sup>a</sup>                         | 95% CI       | P-value                                 |              | OR <sup>a</sup>                          | 95% CI                                   | P-value      |             |
| <b>All antibiotic groups (ref. No treatment)</b>      | 0.82                                    | 0.76         | 0.89                                    | <.0001       | 0.71                                     | 0.66                                     | 0.76         | <.0001      |
| <b>Specific antibiotic groups (ref. No treatment)</b> |                                         |              |                                         |              |                                          |                                          |              |             |
| Penicillins with extended spectrum (J01CA)            | 0.35                                    | 0.30         | 0.39                                    | <.0001       | 0.41                                     | 0.37                                     | 0.45         | <.0001      |
| Nitrofurantoin derivatives (J01XE)                    | 0.34                                    | 0.28         | 0.42                                    | <.0001       | 0.35                                     | 0.30                                     | 0.40         | <.0001      |
| Trimethoprim and derivatives (J01EA)                  | 0.29                                    | 0.21         | 0.40                                    | <.0001       | 0.24                                     | 0.18                                     | 0.32         | <.0001      |
| Fluoroquinolones (J01MA)                              | 10.32                                   | 9.37         | 11.37                                   | <.0001       | 7.18                                     | 6.57                                     | 7.85         | <.0001      |
| Cephalosporins (J01DB-E,I)                            | 1.74                                    | 1.17         | 2.59                                    | 0.006        | 1.39                                     | 0.97                                     | 1.98         | 0.0704      |
| Others <sup>b</sup>                                   | 8.22                                    | 5.70         | 11.87                                   | <.0001       | 6.18                                     | 4.40                                     | 8.68         | <.0001      |

CI: Confidence interval. OR: Odds ratio. Nationwide primary healthcare data was used to identify the study population of women with uncomplicated cystitis. The Swedish Prescribed Drug Register was used to identify antibiotic treatment within two days from the cystitis event but before the pyelonephritis event. Nationwide primary healthcare data and the National Patient Register (Out-patient data) were used to identify pyelonephritis. a: Fully adjusted for history of cervical cancer and parity, and individual sociodemographic factors. b: Other antibiotics included J01MB, J01EB, J01EC, J01ED, J01EE, and J01CR.

**Table S5.** Sensitivity analysis on the association between antibiotic treatment (redeemed within two days) for acute uncomplicated cystitis and acute outpatient pyelonephritis within 7 days and 30 days from the cystitis event, adjusted for sociodemographic factors, cervical cancer, and parity (2006-2018)

| Covariates                                     | Pyelonephritis within 7 days |        |      |         | Pyelonephritis within 30 days |        |      |         |
|------------------------------------------------|------------------------------|--------|------|---------|-------------------------------|--------|------|---------|
|                                                | OR <sup>a</sup>              | 95% CI |      | P-value | OR <sup>a</sup>               | 95% CI |      | P-value |
| <b>Antibiotic (ref. Non)</b>                   | 0.82                         | 0.76   | 0.89 | <.0001  | 0.71                          | 0.66   | 0.76 | <.0001  |
| <b>Age (ref. age 18-24 years)</b>              |                              |        |      |         |                               |        |      |         |
| 25-34                                          | 0.91                         | 0.80   | 1.03 | 0.1437  | 0.91                          | 0.82   | 1.01 | 0.0642  |
| 34-44                                          | 0.97                         | 0.85   | 1.12 | 0.7085  | 0.94                          | 0.84   | 1.06 | 0.3248  |
| 45-65                                          | 0.89                         | 0.78   | 1.01 | 0.0597  | 0.92                          | 0.83   | 1.02 | 0.0968  |
| <b>Educational level (ref. &gt; 12 years)</b>  | 1.00                         | 0.93   | 1.09 | 0.9338  | 1.05                          | 0.98   | 1.13 | 0.1415  |
| <b>Family income (ref. High)</b>               |                              |        |      |         |                               |        |      |         |
| Low                                            | 0.84                         | 0.74   | 0.95 | 0.0040  | 0.89                          | 0.81   | 0.98 | 0.0208  |
| Middle                                         | 0.95                         | 0.86   | 1.04 | 0.2676  | 0.96                          | 0.89   | 1.04 | 0.3487  |
| <b>Region of residence (ref. Large cities)</b> |                              |        |      |         |                               |        |      |         |
| Southern Sweden                                | 0.94                         | 0.86   | 1.03 | 0.1830  | 0.96                          | 0.89   | 1.03 | 0.2537  |
| Northern Sweden                                | 1.27                         | 1.13   | 1.43 | <.0001  | 1.15                          | 1.03   | 1.27 | 0.0097  |
| <b>Country of origin (ref. Born in Sweden)</b> |                              |        |      |         |                               |        |      |         |
| Eastern Europe                                 | 0.85                         | 0.70   | 1.04 | 0.1140  | 1.02                          | 0.88   | 1.19 | 0.8010  |
| Western countries                              | 0.89                         | 0.72   | 1.09 | 0.2518  | 0.96                          | 0.81   | 1.13 | 0.6154  |
| Middle East/North Africa                       | 0.73                         | 0.60   | 0.89 | 0.0023  | 0.78                          | 0.66   | 0.92 | 0.0024  |
| Africa (excluding North Africa)                | 0.88                         | 0.63   | 1.22 | 0.4349  | 0.89                          | 0.67   | 1.17 | 0.3924  |
| Asia (excluding Middle East) and Oceania       | 1.09                         | 0.86   | 1.37 | 0.4839  | 1.09                          | 0.90   | 1.32 | 0.3968  |
| Latin America and the Caribbean                | 0.83                         | 0.58   | 1.18 | 0.2931  | 1.09                          | 0.84   | 1.42 | 0.5060  |
| <b>Cervical cancer (ref. Non)</b>              | 0.97                         | 0.88   | 1.06 | 0.4739  | 0.97                          | 0.90   | 1.05 | 0.5000  |
| <b>Parity (ref. Non)</b>                       | 1.06                         | 0.85   | 1.32 | 0.6068  | 1.14                          | 0.95   | 1.36 | 0.1645  |

CI: Confidence interval. OR: Odds ratio. Nationwide primary healthcare data was used to identify the study population of women with uncomplicated cystitis. The Swedish Prescribed Drug Register was used to identify antibiotic treatment. a: Fully adjusted for history of cervical cancer and parity, and individual sociodemographic factors.

**Table S6** The study population of women with acute uncomplicated cystitis and hospitalization due to acute pyelonephritis (outcome) diagnosed within 30 days and 90 days from the cystitis event (2006-2018)

|                                                                                                                 | Total population |              | With acute pyelonephritis within: |              |             |            |              |             |
|-----------------------------------------------------------------------------------------------------------------|------------------|--------------|-----------------------------------|--------------|-------------|------------|--------------|-------------|
|                                                                                                                 | No.              | Proportion % | 30 days                           |              |             | 90 days    |              |             |
|                                                                                                                 | No.              | Proportion % | No.                               | Proportion % | Case rate % | No.        | Proportion % | Case rate % |
| Including the 1969 women with pyelonephritis prior to antibiotic treatment in the no antibiotic treatment group |                  |              |                                   |              |             |            |              |             |
| <b>No antibiotic treatment</b>                                                                                  | 407 772          | 54.2         | 2355                              | 91.5         | 0.58        | 2495       | 90.0         | 0.61        |
| <b>Any antibiotic<sup>a</sup></b>                                                                               | 344 517          | 46.8         | 219                               | 8.5          | 0.06        | 278        | 10.0         | 0.08        |
| <b>All</b>                                                                                                      | 752 289          | 100.0        | 2574                              | 100.0        | 0.34        | 2773       | 100.0        | 0.37        |
| Excluding the 1969 women with pyelonephritis prior to antibiotic treatment                                      |                  |              |                                   |              |             |            |              |             |
| <b>No antibiotic treatment</b>                                                                                  | 405 803          | 54.1         | 386                               | 63.8         | 0.10        | 526        | 65.4         | 0.13        |
| <b>Any antibiotic<sup>a</sup></b>                                                                               | 344 517          | 45.9         | 219                               | 36.2         | 0.06        | 278        | 34.6         | 0.08        |
| Penicillins with extended spectrum (J01CA)                                                                      | 201 351          | 26.8         | 91                                | 15.0         | 0.05        | 121        | 15.0         | 0.06        |
| Nitrofurantoin derivatives (J01XE)                                                                              | 85 285           | 11.4         | 25                                | 4.1          | 0.03        | 39         | 4.9          | 0.05        |
| Trimethoprim and derivatives (J01EA)                                                                            | 35 369           | 4.7          | 15                                | 2.5          | 0.04        | 16         | 2.0          | 0.05        |
| Fluoroquinolones (J01MA)                                                                                        | 17 275           | 2.3          | 81                                | 13.4         | 0.47        | 94         | 11.7         | 0.54        |
| Cephalosporins (J01DB-E,I)                                                                                      | 4149             | 0.6          | 7                                 | 1.2          | 0.17        | 8          | 1.0          | 0.19        |
| Others <sup>b</sup>                                                                                             | 1088             | 0.1          | 0                                 | 0.0          | 0.00        | 0          | 0.0          | 0.00        |
| <b>Age groups (years)</b>                                                                                       |                  |              |                                   |              |             |            |              |             |
| 18-24                                                                                                           | 156 992          | 20.9         | 167                               | 27.6         | 0.11        | 230        | 28.6         | 0.15        |
| 25-34                                                                                                           | 157 626          | 21.0         | 142                               | 23.5         | 0.09        | 190        | 23.6         | 0.12        |
| 34-44                                                                                                           | 141 032          | 18.8         | 112                               | 18.5         | 0.08        | 141        | 17.5         | 0.10        |
| 45-65                                                                                                           | 294 670          | 39.3         | 184                               | 30.4         | 0.06        | 243        | 30.2         | 0.08        |
| <b>Educational level</b>                                                                                        |                  |              |                                   |              |             |            |              |             |
| <12                                                                                                             | 467 080          | 62.3         | 388                               | 64.1         | 0.08        | 518        | 64.4         | 0.11        |
| > 12                                                                                                            | 283 240          | 37.7         | 217                               | 35.9         | 0.08        | 286        | 35.6         | 0.10        |
| <b>Family income</b>                                                                                            |                  |              |                                   |              |             |            |              |             |
| Low                                                                                                             | 179 621          | 23.9         | 135                               | 22.3         | 0.08        | 186        | 23.1         | 0.10        |
| Middle                                                                                                          | 380 486          | 50.7         | 331                               | 54.7         | 0.09        | 427        | 53.1         | 0.11        |
| High                                                                                                            | 190 213          | 25.4         | 139                               | 23.0         | 0.07        | 191        | 23.8         | 0.10        |
| <b>Region of residence</b>                                                                                      |                  |              |                                   |              |             |            |              |             |
| Large cities                                                                                                    | 482 822          | 64.3         | 405                               | 66.9         | 0.08        | 530        | 65.9         | 0.11        |
| Southern Sweden                                                                                                 | 194 500          | 25.9         | 129                               | 21.3         | 0.07        | 176        | 21.9         | 0.09        |
| Northern Sweden                                                                                                 | 72 998           | 9.7          | 71                                | 11.7         | 0.10        | 98         | 12.2         | 0.13        |
| <b>Country of origin</b>                                                                                        |                  |              |                                   |              |             |            |              |             |
| Sweden (born in)                                                                                                | 596 865          | 79.5         | 493                               | 81.5         | 0.08        | 654        | 81.3         | 0.11        |
| Eastern Europe                                                                                                  | 36 332           | 4.8          | 31                                | 5.1          | 0.09        | 45         | 5.6          | 0.12        |
| Western countries                                                                                               | 31 423           | 4.2          | 17                                | 2.8          | 0.05        | 20         | 2.5          | 0.06        |
| Middle East/North Africa                                                                                        | 42 886           | 5.7          | 27                                | 4.5          | 0.06        | 34         | 4.2          | 0.08        |
| Africa (excluding North Africa)                                                                                 | 11 868           | 1.6          | 11                                | 1.8          | 0.09        | 13         | 1.6          | 0.11        |
| Asia (excluding Middle East) and Oceania                                                                        | 20 357           | 2.7          | 16                                | 2.6          | 0.08        | 26         | 3.2          | 0.13        |
| Latin America and the Caribbean                                                                                 | 10 589           | 1.4          | 10                                | 1.7          | 0.09        | 12         | 1.5          | 0.11        |
| <b>Parity</b>                                                                                                   |                  |              |                                   |              |             |            |              |             |
| No child                                                                                                        | 319 165          | 42.5         | 277                               | 45.8         | 0.09        | 388        | 48.3         | 0.12        |
| With child                                                                                                      | 431 155          | 57.5         | 328                               | 54.2         | 0.08        | 416        | 51.7         | 0.10        |
| <b>Cervical cancer</b>                                                                                          |                  |              |                                   |              |             |            |              |             |
| Non                                                                                                             | 729 289          | 97.2         | 578                               | 95.5         | 0.08        | 769        | 95.6         | 0.11        |
| Yes                                                                                                             | 21 031           | 2.8          | 27                                | 4.5          | 0.13        | 35         | 4.4          | 0.17        |
| <b>All</b>                                                                                                      | <b>750 320</b>   | <b>100.0</b> | <b>605</b>                        | <b>100.0</b> | <b>0.08</b> | <b>804</b> | <b>100.0</b> | <b>0.11</b> |

a: within five days from the cystitis event and before the pyelonephritis event. \* 1969 women were excluded due to diagnosis of outcomes before antibiotic treatment. b: Others included ATC-codes J01MB, J01EB, J01EC, J01ED, J01EE, and J01CR. Nationwide primary healthcare data was used to identify the study population of women with uncomplicated cystitis. The Swedish Prescribed Drug Register was used to identify antibiotic treatment groups. The National Patient Register (In-patient data) were used to identify hospitalization due to pyelonephritis.

**Table S7.** The association between antibiotic treatment (redeemed within five days) for acute uncomplicated cystitis and hospitalization due to acute pyelonephritis within 30 days from the cystitis event, adjusted for sociodemographic factors, cervical cancer, and parity (2006-2018)

| Covariates                                     | Model 1 |        |         |        | Model 2 |        |         |        | Model 3 |        |         |        |
|------------------------------------------------|---------|--------|---------|--------|---------|--------|---------|--------|---------|--------|---------|--------|
|                                                | OR      | 95% CI | P-value |        | OR      | 95% CI | P-value |        | OR      | 95% CI | P-value |        |
| <b>Antibiotic (ref. Non)</b>                   | 0.67    | 0.57   | 0.79    | <.0001 | 0.65    | 0.55   | 0.77    | <.0001 | 0.65    | 0.55   | 0.77    | <.0001 |
| <b>Age (ref. age 18-24 years)</b>              |         |        |         |        |         |        |         |        |         |        |         |        |
| 25-34                                          |         |        |         |        | 0.84    | 0.67   | 1.06    | 0.1519 | 0.81    | 0.63   | 1.03    | 0.0893 |
| 34-44                                          |         |        |         |        | 0.74    | 0.58   | 0.94    | 0.0152 | 0.69    | 0.52   | 0.92    | 0.0105 |
| 45-65                                          |         |        |         |        | 0.57    | 0.46   | 0.71    | <.0001 | 0.54    | 0.42   | 0.70    | <.0001 |
| <b>Educational level (ref. &gt; 12 years)</b>  |         |        |         |        | 1.06    | 0.89   | 1.26    | 0.5239 | 1.05    | 0.89   | 1.25    | 0.5661 |
| <b>Family income (ref. High)</b>               |         |        |         |        |         |        |         |        |         |        |         |        |
| Low                                            |         |        |         |        | 0.90    | 0.70   | 1.16    | 0.4080 | 0.89    | 0.69   | 1.15    | 0.3604 |
| Middle                                         |         |        |         |        | 1.09    | 0.89   | 1.34    | 0.3867 | 1.09    | 0.89   | 1.33    | 0.4254 |
| <b>Region of residence (ref. Large cities)</b> |         |        |         |        |         |        |         |        |         |        |         |        |
| Southern Sweden                                |         |        |         |        | 0.76    | 0.62   | 0.93    | 0.0077 | 0.76    | 0.62   | 0.93    | 0.0075 |
| Northern Sweden                                |         |        |         |        | 1.11    | 0.86   | 1.44    | 0.4132 | 1.11    | 0.86   | 1.43    | 0.4194 |
| <b>Country of origin (ref. Born in Sweden)</b> |         |        |         |        |         |        |         |        |         |        |         |        |
| Eastern Europe                                 |         |        |         |        | 1.10    | 0.77   | 1.60    | 0.5966 | 1.12    | 0.78   | 1.62    | 0.5376 |
| Western countries                              |         |        |         |        | 0.75    | 0.46   | 1.21    | 0.2362 | 0.76    | 0.47   | 1.23    | 0.2617 |
| Middle East/North Africa                       |         |        |         |        | 0.80    | 0.54   | 1.20    | 0.2818 | 0.82    | 0.55   | 1.23    | 0.3386 |
| Africa (excluding North Africa)                |         |        |         |        | 1.15    | 0.63   | 2.10    | 0.6607 | 1.18    | 0.64   | 2.16    | 0.5963 |
| Asia (excluding Middle East) and Oceania       |         |        |         |        | 1.00    | 0.61   | 1.65    | 0.9983 | 1.02    | 0.61   | 1.68    | 0.9545 |
| Latin America and the Caribbean                |         |        |         |        | 1.20    | 0.64   | 2.24    | 0.5779 | 1.21    | 0.65   | 2.28    | 0.5477 |
| <b>Cervical cancer (ref. Non)</b>              |         |        |         |        |         |        |         |        | 1.10    | 0.90   | 1.34    | 0.3422 |
| <b>Parity (ref. Non)</b>                       |         |        |         |        |         |        |         |        | 1.42    | 0.96   | 2.09    | 0.0800 |

CI: Confidence interval. OR: Odds ratio. Nationwide primary healthcare data was used to identify the study population of women with uncomplicated cystitis. The Swedish Prescribed Drug Register was used to identify antibiotic treatment. The National Patient Register (In-patient data) was used to identify hospitalization due to pyelonephritis. Model 1: Univariate. Model 2: Adjusted for individual sociodemographic factors. Model 3: Fully adjusted for all covariates



**Table S8.** The association between antibiotic treatment (redeemed within five days) for acute uncomplicated cystitis and hospitalization due to acute pyelonephritis within 90 days from the cystitis event, adjusted for sociodemographic factors, cervical cancer, and parity (2006-2018)

| Covariates                                     | Model 1 |        |      | P-value | Model 2 |        |      | P-value | Model 3 |        |      | P-value |
|------------------------------------------------|---------|--------|------|---------|---------|--------|------|---------|---------|--------|------|---------|
|                                                | OR      | 95% CI |      |         | OR      | 95% CI |      |         | OR      | 95% CI |      |         |
| <b>Antibiotic (ref. Non)</b>                   | 0.62    | 0.54   | 0.72 | <.0001  | 0.60    | 0.52   | 0.70 | <.0001  | 0.61    | 0.52   | 0.70 | <.0001  |
| <b>Age (ref. age 18-24 years)</b>              |         |        |      |         |         |        |      |         |         |        |      |         |
| 25-34                                          |         |        |      |         | 0.81    | 0.66   | 0.99 | 0.0395  | 0.81    | 0.66   | 1.00 | 0.0505  |
| 34-44                                          |         |        |      |         | 0.67    | 0.54   | 0.83 | 0.0002  | 0.67    | 0.53   | 0.86 | 0.0017  |
| 45-65                                          |         |        |      |         | 0.54    | 0.45   | 0.65 | <.0001  | 0.55    | 0.44   | 0.69 | <.0001  |
| <b>Educational level (ref. &gt; 12 years)</b>  |         |        |      |         | 1.06    | 0.91   | 1.24 | 0.4337  | 1.06    | 0.91   | 1.23 | 0.4448  |
| <b>Family income (ref. High)</b>               |         |        |      |         |         |        |      |         |         |        |      |         |
| Low                                            |         |        |      |         | 0.89    | 0.71   | 1.10 | 0.2823  | 0.89    | 0.71   | 1.11 | 0.2981  |
| Middle                                         |         |        |      |         | 1.02    | 0.85   | 1.21 | 0.8710  | 1.02    | 0.85   | 1.21 | 0.8619  |
| <b>Region of residence (ref. Large cities)</b> |         |        |      |         |         |        |      |         |         |        |      |         |
| Southern Sweden                                |         |        |      |         | 0.79    | 0.67   | 0.94 | 0.0082  | 0.79    | 0.67   | 0.94 | 0.0083  |
| Northern Sweden                                |         |        |      |         | 1.17    | 0.94   | 1.46 | 0.1516  | 1.17    | 0.94   | 1.46 | 0.1544  |
| <b>Country of origin (ref. Born in Sweden)</b> |         |        |      |         |         |        |      |         |         |        |      |         |
| Eastern Europe                                 |         |        |      |         | 1.23    | 0.90   | 1.67 | 0.1923  | 1.23    | 0.90   | 1.67 | 0.1901  |
| Western countries                              |         |        |      |         | 0.67    | 0.43   | 1.05 | 0.0786  | 0.67    | 0.43   | 1.05 | 0.0809  |
| Middle East/North Africa                       |         |        |      |         | 0.76    | 0.54   | 1.09 | 0.1373  | 0.77    | 0.54   | 1.10 | 0.1513  |
| Africa (excluding North Africa)                |         |        |      |         | 1.02    | 0.59   | 1.78 | 0.9399  | 1.03    | 0.59   | 1.80 | 0.9123  |
| Asia (excluding Middle East) and Oceania       |         |        |      |         | 1.25    | 0.84   | 1.85 | 0.2762  | 1.25    | 0.84   | 1.86 | 0.2686  |
| Latin America and the Caribbean                |         |        |      |         | 1.10    | 0.62   | 1.96 | 0.7361  | 1.11    | 0.62   | 1.96 | 0.7288  |
| <b>Cervical cancer (ref. Non)</b>              |         |        |      |         |         |        |      |         | 0.99    | 0.84   | 1.17 | 0.9031  |
| <b>Parity (ref. Non)</b>                       |         |        |      |         |         |        |      |         | 1.37    | 0.97   | 1.93 | 0.0707  |

CI: Confidence interval. OR: Odds ratio. Nationwide primary healthcare data was used to identify the study population of women with uncomplicated cystitis. The Swedish Prescribed Drug Register was used to identify antibiotic treatment. The National Patient Register (In-patient data) was used to identify hospitalization due to pyelonephritis. Model 1: Univariate. Model 2: Adjusted for individual sociodemographic factors. Model 3: Fully adjusted for all covariates.

**Figure S1.** Flowchart of the eligibility criteria and sampling of the study population of women with a diagnose (first occurrence) of acute uncomplicated cystitis in nationwide primary healthcare data (1<sup>st</sup> January 2006 to 2<sup>nd</sup> October 2018) and follow-up for pyelonephritis (31<sup>st</sup> December 2018)

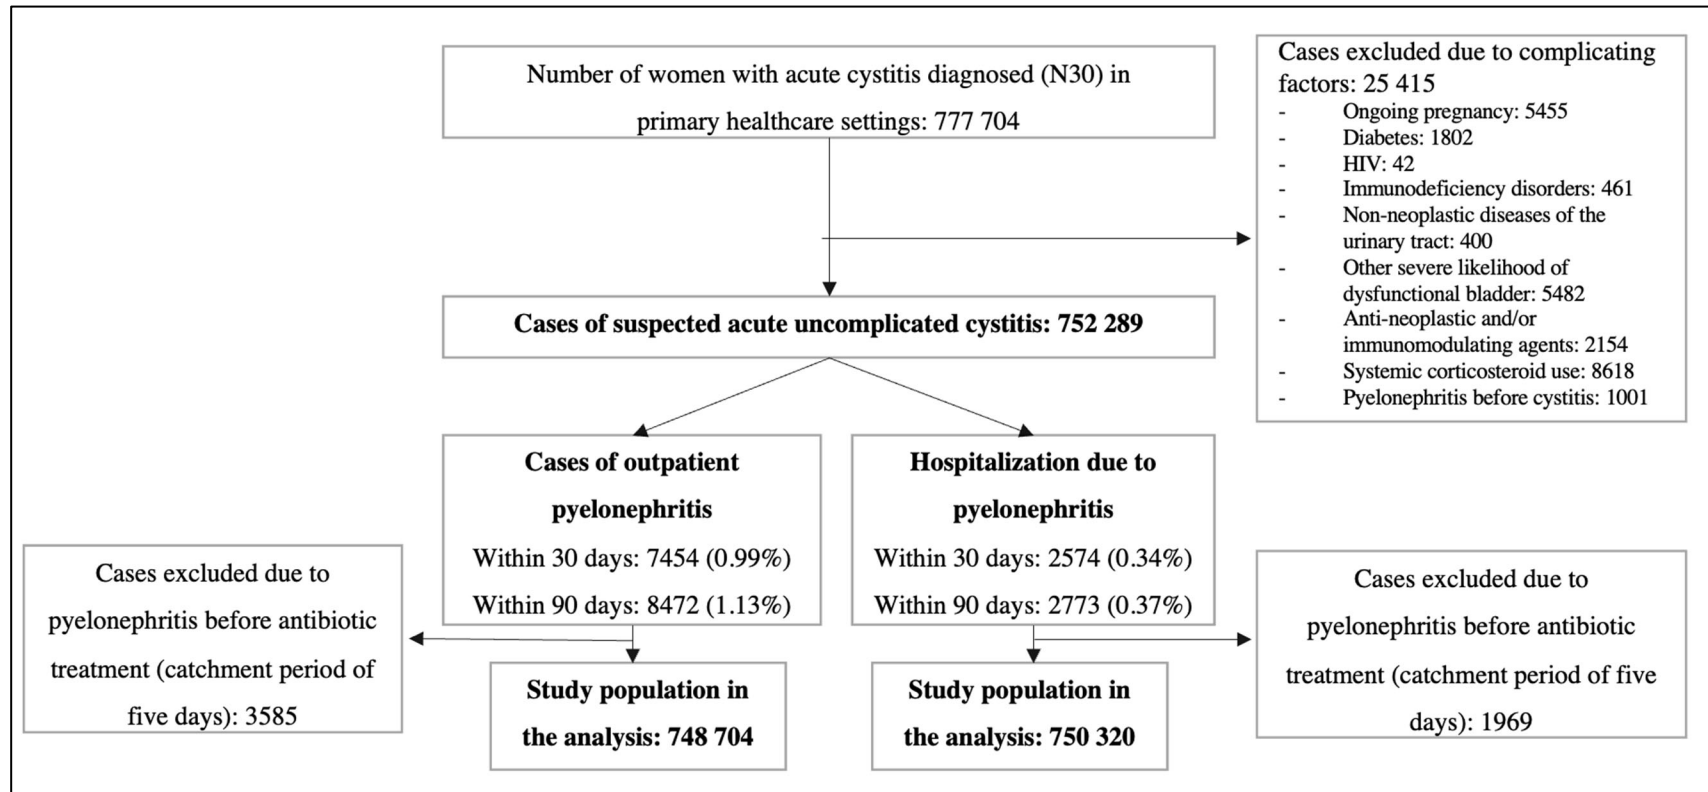

**Figure S2.** The 30-day risk of acute outpatient pyelonephritis after acute uncomplicated cystitis treated with antibiotics or not (redeemed within two days)  
(survival probability 1.00 = no cases of pyelonephritis)

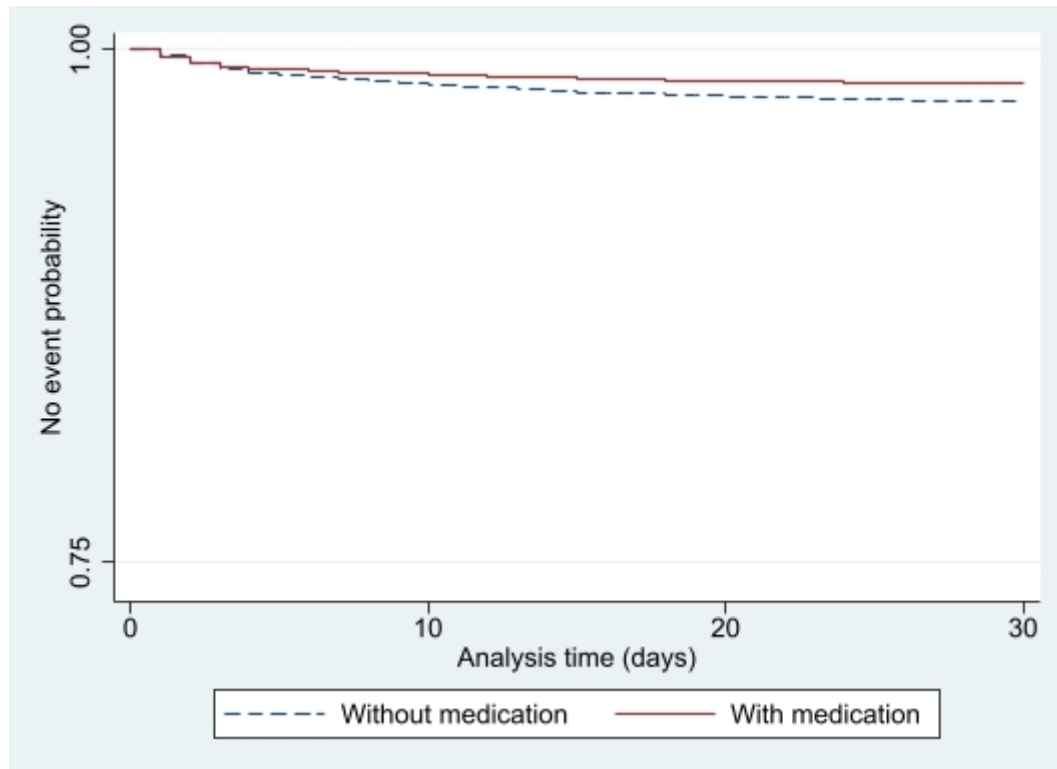

**Figure S3.** The 30-day risk of acute outpatient pyelonephritis after acute uncomplicated cystitis treated with antibiotics or not (redeemed within five days)  
(survival probability 1.00 = no cases of pyelonephritis)

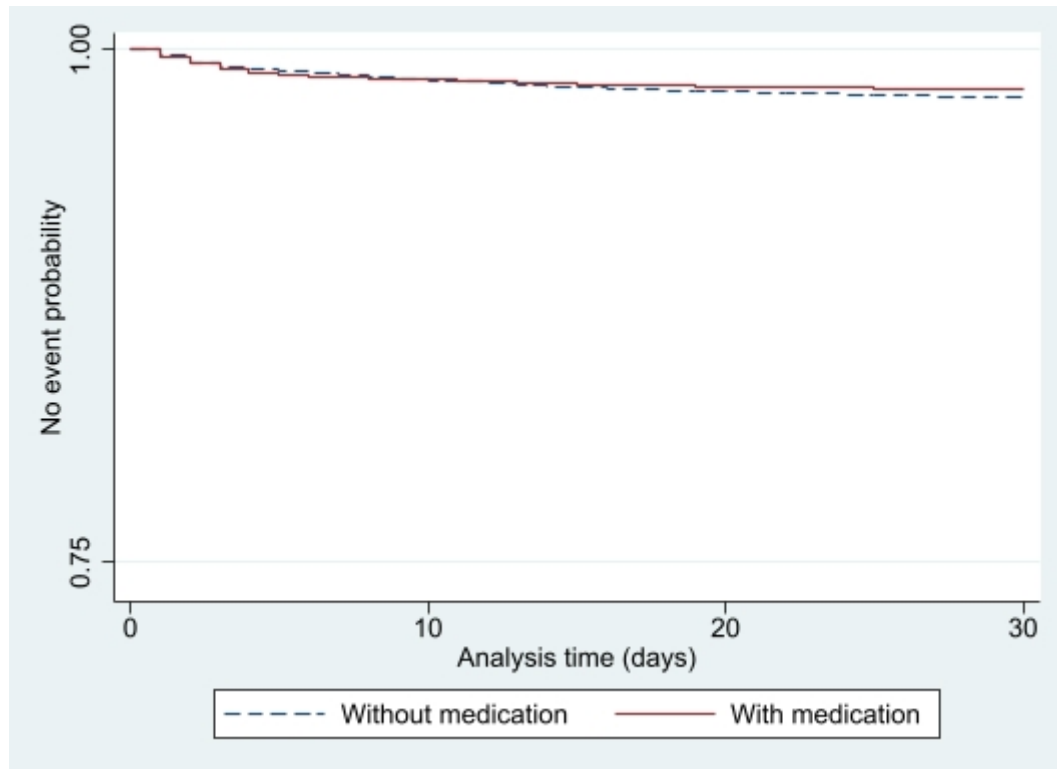

**Figure S4.** The 30-day risk of hospitalization due to acute pyelonephritis after acute uncomplicated cystitis treated with antibiotics or not (redeemed within five days)  
(survival probability 1.00 = no cases of pyelonephritis)

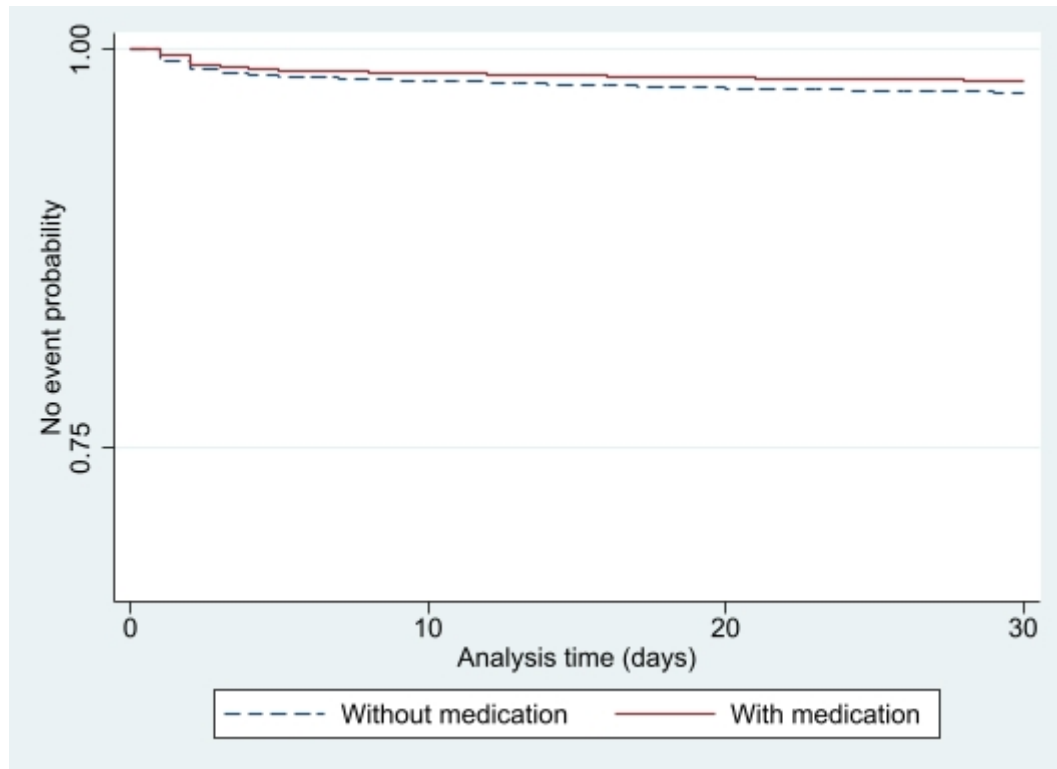

Supplement: s1 [file s1]
